# Supplementary material for: Rapid topographic growth of Diancang Shan, southeastern margin of the Tibetan Plateau, since 5.0–3.5 Ma
Source: Copernicus journal article supplement (doi:10.5194/cp-20-2399-2024), 2024-11-03
Supplement: Supplementary file 1 [file cp-20-2399-2024-supplement.zip]

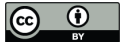

*Supplement of*

## **Rapid topographic growth of Diancang Shan, southeastern margin of the Tibetan Plateau, since 5.0–3.5 Ma**

**Chunxia Zhang et al.**

*Correspondence to:* Chunxia Zhang (cxzhang@mail.iggcas.ac.cn)

- cp-20-2399-2024-supplement-title-page.pdf
- Supplement.docx

The copyright of individual parts of the supplement might differ from the article licence.
